# Supplementary material for: Cytochrome c Oxidase Sequences of Zambian Wildlife Helps to Identify Species of Origin of Meat
Source: Hindawi journal article supplement (doi:10.1155/2016/1808912), 2016-01-01
Supplement: f1 [file 1808912.f1.pdf]

**Supplementary Table 1**

| <b>Family</b> | <b>Subfamily</b> | <b>Scientific Name</b> | <b>Accession</b> | <b>Labelled As</b> | <b>Country</b>    |
|---------------|------------------|------------------------|------------------|--------------------|-------------------|
| Bovidae       | Aepycerotinae    | Aepyceros melampus     | JQ690386         | IMPALA             | Zambia            |
| Bovidae       | Alcelaphinae     | Connochaetes taurinus  | JQ690393         | WILDEBEEST         | Zambia            |
| Bovidae       | Bovinae          | Syncerus caffer        | JQ690392         | BUFFALO            | Zambia            |
| Bovidae       | Bovinae          | Tragelaphus scriptus   | JQ690389         | BUSHBUCK           | Zambia            |
| Bovidae       | Bovinae          | Tragelaphus oryx       | JQ690384         | ELAND              | Zambia            |
| Bovidae       | Hippotraginae    | Hippotragus niger      | JQ690394         | SABLE              | Zambia            |
| Bovidae       | Reduncinae       | Kobus leche            | JQ690387         | KAFUE_LECHWE       | Zambia            |
| Bovidae       | Reduncinae       | Kobus vardonii         | JQ690383         | PUKU               | Zambia            |
| Bovidae       | Reduncinae       | Kobus ellipsiprymnus   | JQ690391         | WATERBUCK          | Zambia            |
| Bovidae       | Aepycerotinae    | Aepyceros melampus     | HQ603134         | Impala             | Tanzania          |
| Bovidae       | Alcelaphinae     | Connochaetes gnou      | JN632626         | Black_Wildebeest   | South Africa      |
| Bovidae       | Alcelaphinae     | Alcelaphus buselaphus  | HQ603087         | Hartebeests        | Tanzania          |
| Bovidae       | Alcelaphinae     | Damaliscus lunatus     | HQ603147         | Sassabies          | Tanzania          |
| Bovidae       | Alcelaphinae     | Connochaetes taurinus  | HQ603109         | Wildebeest         | Tanzania          |
| Bovidae       | Antilopinae      | Nanger granti          | HQ603102         | True_Antelopes     | Tanzania          |
| Bovidae       | Bovinae          | Tragelaphus eurycerus  | GQ144639         | Bongo              | Republic of Congo |
| Bovidae       | Bovinae          | Syncerus caffer        | HQ603123         | Buffalo            | Tanzania          |
| Bovidae       | Bovinae          | Tragelaphus scriptus   | JN632707         | Bushbuck           | Tanzania          |
| Bovidae       | Bovinae          | Tragelaphus oryx       | HQ603169         | Common_Eland       | Tanzania          |

|         |               |                          |          |               |              |
|---------|---------------|--------------------------|----------|---------------|--------------|
| Bovidae | Bovinae       | Bos taurus               | JN817349 | Cow           | Ethiopia     |
| Bovidae | Bovinae       | Taurotragus derbianus    | EF536354 | Giant_Eland   | -            |
| Bovidae | Bovinae       | Tragelaphus strepsiceros | HQ603161 | Greater_Kudu  | Tanzania     |
| Bovidae | Bovinae       | Tragelaphus imberbis     | EF536356 | Lesser_Kudu   | Tanzania     |
| Bovidae | Bovinae       | Tragelaphus angasii      | JN632702 | Nyala         | South Africa |
| Bovidae | Bovinae       | Tragelaphus spekeii      | EF536357 | Sitatunga     | Gabon        |
| Bovidae | Bovinae       | Bos indicus              | JN817298 | Zebu          | Ethiopia     |
| Bovidae | Caprinae      | Capra aegagrus hircus    | HQ603175 | Goat          | Tanzania     |
| Bovidae | Caprinae      | Ovis aries               | HQ603178 | Sheep         | Tanzania     |
| Bovidae | Cephalophinae | Cephalophus adersi       | JN632611 | Duikers       | Tanzania     |
| Bovidae | Hippotraginae | Addax nasomaculatus      | JN632591 | Addax         | -            |
| Bovidae | Hippotraginae | Oryx gazella             | JN869312 | Oryx          | South Africa |
| Bovidae | Hippotraginae | Hippotragus equinus      | JN632647 | Roan_Antelope | Malawi       |
| Bovidae | Hippotraginae | Hippotragus niger        | JN632648 | Sable         | -            |
| Bovidae | Peleinae      | Pelea capreolus          | JN632684 | Grey_Rhebok   | South Africa |
| Bovidae | Reduncinae    | Kobus leche              | NC018603 | Kafue_Lechwe  | -            |
| Bovidae | Reduncinae    | Redunca fulvorufula      | JN632695 | Reedbuck      | Tanzania     |
| Bovidae | Reduncinae    | Kobus ellipsiprymnus     | HQ603158 | Waterbuck     | Tanzania     |
|         | Cervidae      | Dama dama                | EF675699 | Deer          | -            |

---

**Supplementary Table 2**

| <b>Scientific Name</b> | <b>Genbank Accession</b> | <b>Subtree</b> | <b>Labelled As</b> | <b>Country</b> |
|------------------------|--------------------------|----------------|--------------------|----------------|
| Syncerus caffer        | JQ690392                 | Buffalo        | ZAM                | Zambia         |
| Syncerus caffer        | HQ603123                 | Buffalo        | T1                 | Tanzania       |
| Syncerus caffer        | HQ603124                 | Buffalo        | T2                 | Tanzania       |
| Syncerus caffer        | HQ603125                 | Buffalo        | T3                 | Tanzania       |
| Syncerus caffer        | HQ603126                 | Buffalo        | T4                 | Tanzania       |
| Syncerus caffer        | HQ603127                 | Buffalo        | T5                 | Tanzania       |
| Syncerus caffer        | HQ603128                 | Buffalo        | T6                 | Tanzania       |
| Syncerus caffer        | HQ603129                 | Buffalo        | T7                 | Tanzania       |
| Syncerus caffer        | HQ603130                 | Buffalo        | T8                 | Tanzania       |
| Syncerus caffer        | HQ603131                 | Buffalo        | T9                 | Tanzania       |
| Syncerus caffer        | HQ603132                 | Buffalo        | T10                | Tanzania       |
| Syncerus caffer        | HQ603133                 | Buffalo        | T11                | Tanzania       |
| Syncerus caffer        | JQ235505                 | Buffalo        | B1                 | Botswana       |
| Syncerus caffer        | JQ235506                 | Buffalo        | Z1                 | Zimbabwe       |
| Syncerus caffer        | JQ235507                 | Buffalo        | Z2                 | Zimbabwe       |
| Syncerus caffer        | JQ235508                 | Buffalo        | Z3                 | Zimbabwe       |
| Syncerus caffer        | JQ235509                 | Buffalo        | B2                 | Botswana       |
| Syncerus caffer        | JQ235510                 | Buffalo        | B3                 | Botswana       |
| Syncerus caffer        | JQ235511                 | Buffalo        | Z4                 | Zimbabwe       |
| Syncerus caffer        | JQ235512                 | Buffalo        | Z5                 | Zimbabwe       |
| Syncerus caffer        | JQ235513                 | Buffalo        | Z6                 | Zimbabwe       |
| Syncerus caffer        | JQ235514                 | Buffalo        | B4                 | Botswana       |
| Syncerus caffer        | JQ235515                 | Buffalo        | B5                 | Botswana       |
| Syncerus caffer        | JQ235516                 | Buffalo        | Z7                 | Zimbabwe       |
| Syncerus caffer        | JQ235517                 | Buffalo        | B6                 | Botswana       |
| Syncerus caffer        | JQ235518                 | Buffalo        | B7                 | Botswana       |
| Syncerus caffer        | JQ235519                 | Buffalo        | Z7                 | Zimbabwe       |
| Syncerus caffer        | JQ235520                 | Buffalo        | B9                 | Botswana       |
| Syncerus caffer        | JQ235521                 | Buffalo        | E1                 | Ethiopia       |
| Syncerus caffer        | JQ235522                 | Buffalo        | E2                 | Ethiopia       |
| Syncerus caffer        | JQ235523                 | Buffalo        | E3                 | Ethiopia       |
| Syncerus caffer        | JQ235524                 | Buffalo        | E4                 | Ethiopia       |
| Syncerus caffer        | JQ235525                 | Buffalo        | E5                 | Ethiopia       |
| Syncerus caffer        | JQ235526                 | Buffalo        | E6                 | Ethiopia       |
| Syncerus caffer        | JQ235527                 | Buffalo        | E7                 | Ethiopia       |
| Syncerus caffer        | JQ235528                 | Buffalo        | K1                 | Kenya          |
| Syncerus caffer        | JQ235529                 | Buffalo        | K2                 | Kenya          |
| Syncerus caffer        | JQ235530                 | Buffalo        | K3                 | Kenya          |
| Syncerus caffer        | JQ235531                 | Buffalo        | K4                 | Kenya          |
| Syncerus caffer        | JQ235532                 | Buffalo        | K5                 | Kenya          |
| Syncerus caffer        | JQ235533                 | Buffalo        | K6                 | Kenya          |
| Syncerus caffer        | JQ235534                 | Buffalo        | K7                 | Kenya          |
| Syncerus caffer        | JQ235535                 | Buffalo        | K8                 | Kenya          |
| Syncerus caffer        | JQ235536                 | Buffalo        | K9                 | Kenya          |

|                 |          |         |     |       |
|-----------------|----------|---------|-----|-------|
| Syncerus caffer | JQ235537 | Buffalo | K10 | Kenya |
| Syncerus caffer | JQ235538 | Buffalo | K11 | Kenya |
| Syncerus caffer | JQ235539 | Buffalo | K12 | Kenya |

---
